# Supplementary material for: ORCHIMIC (v1.0), a microbe-driven model for soil organic matterdecomposition designed for large-scale applications
Source: Copernicus journal article supplement (doi:10.5194/gmd-2017-325), 2018-02-13
Supplement: Supplementary file [file gmd-2017-325-AC1-supplement.zip]

**Supporting information for “ORCHIMIC (v1.0), a  
microbe-driven model for soil organic matter  
decomposition designed for large-scale applications”**

Ye Huang<sup>1</sup>, Bertrand Guenet<sup>1</sup>, Philippe Ciais<sup>1</sup>, Ivan A. Janssens<sup>2</sup>, Jennifer L. Soong<sup>2,3</sup>,  
Yilong Wang<sup>1</sup>, Daniel Goll<sup>1</sup>, Evgenia Blagodatskaya<sup>4,5</sup>, Yuanyuan Huang<sup>1</sup>

<sup>1</sup>Laboratoire des Sciences du Climat et de l’Environnement, LSCE/IPSL, CEA-  
CNRS-UVSQ, Université Paris-Saclay, 91191 Gif-sur-Yvette, France

<sup>2</sup>University of Antwerp, Department of Biology, 2610 Wilrijk, Belgium

<sup>3</sup>Lawrence Berkeley National Laboratory, 94720, Berkeley, CA, USA

<sup>4</sup>Department of Agricultural Soil Science, University of Goettingen, Büsgenweg 2  
37077 Göttingen, Germany

<sup>5</sup>Institute of Physicochemical and Biological Problems in Soil Science, 142290  
Pushchino, Russia

Correspondence to: Ye Huang (ye.huang@lsce.ipsl.fr)

18 **Table S1.** List of parameters with their prior values, range and optimized values for  
19 CENTURY and PRIM models

| Parameters | Units           | Prior values<br>(range)              | CENTURY               | PRIM                  | References                 |
|------------|-----------------|--------------------------------------|-----------------------|-----------------------|----------------------------|
| $K_{LM}$   | d <sup>-1</sup> | 0.04<br>4.0×10 <sup>-4</sup> -0.4    | 3.99×10 <sup>-3</sup> | 5.49×10 <sup>-3</sup> | <i>Parton et al., 1987</i> |
| $K_{SS}$   | d <sup>-1</sup> | 0.0011<br>1.1×10 <sup>-5</sup> -0.11 | 3.06×10 <sup>-4</sup> | 8.32×10 <sup>-4</sup> | <i>Parton et al., 1987</i> |
| $Adj_{SA}$ | unitless        | 37<br>(18.5-74)                      | 64.2                  | 61.2                  | <i>Parton et al., 1987</i> |
| $Adj_{SP}$ | unitless        | 29<br>(14.5-58)                      | 31.5                  | 29.1                  | <i>Parton et al., 1987</i> |
| $c_{SA}$   | kg soil/g C     | 493.7<br>(0.0002-1000)               | -                     | 0.252                 | <i>Guenet et al., 2016</i> |
| $c_{SS}$   | kg soil/g C     | 193.0<br>(0.0002-1000)               | -                     | 514                   | <i>Guenet et al., 2016</i> |
| $c_{SP}$   | kg soil/g C     | 136.5<br>(0.0002-1000)               | -                     | 2.00×10 <sup>-4</sup> | <i>Guenet et al., 2016</i> |

20

21 **Table S2.** Akaike information criterion (AIC) values for different models

| Models  | RF only | RS only | RS <sub>Ctrl</sub> only | Priming<br>effect only | All    |
|---------|---------|---------|-------------------------|------------------------|--------|
| CENTURY | 214.5   | 36.1    | -34.0                   | 1530.8                 | 1723.4 |
| PRIM    | 85.8    | 11.0    | -20.3                   | 67.7                   | 102.2  |
| C-MFT1  | -86.8   | -39.3   | -52.9                   | 1.2                    | -309.7 |
| C-MFT2  | -93.8   | -46.2   | -51.8                   | -26.5                  | -350.4 |
| C-MFT3  | -92.2   | -43.4   | -50.7                   | -21.1                  | -339.4 |
| CN-MFT1 | -90.2   | -40.0   | -53.1                   | -4.7                   | -319.9 |
| CN-MFT2 | -93.8   | -46.2   | -51.8                   | -26.5                  | -350.4 |
| CN-MFT3 | -83.9   | -37.2   | -52.1                   | -2.0                   | -307.3 |

22

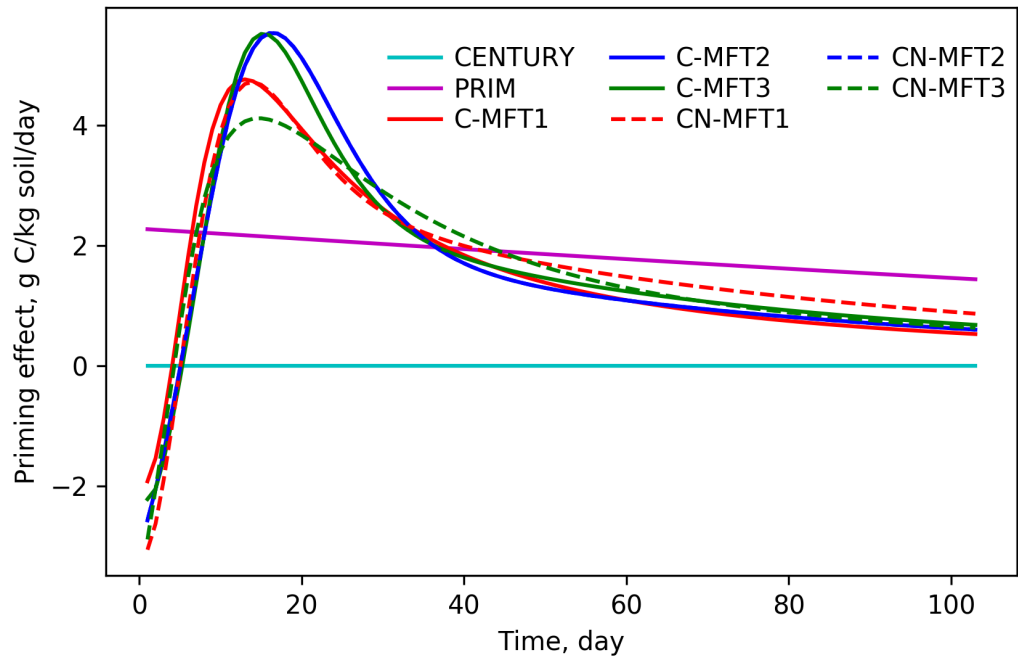

**Figure S1.** Modelled priming effects by CENTURY, PRIM and 6 ORCHIMIC variants (C-MFT2 overlapped with CN-MFT2)

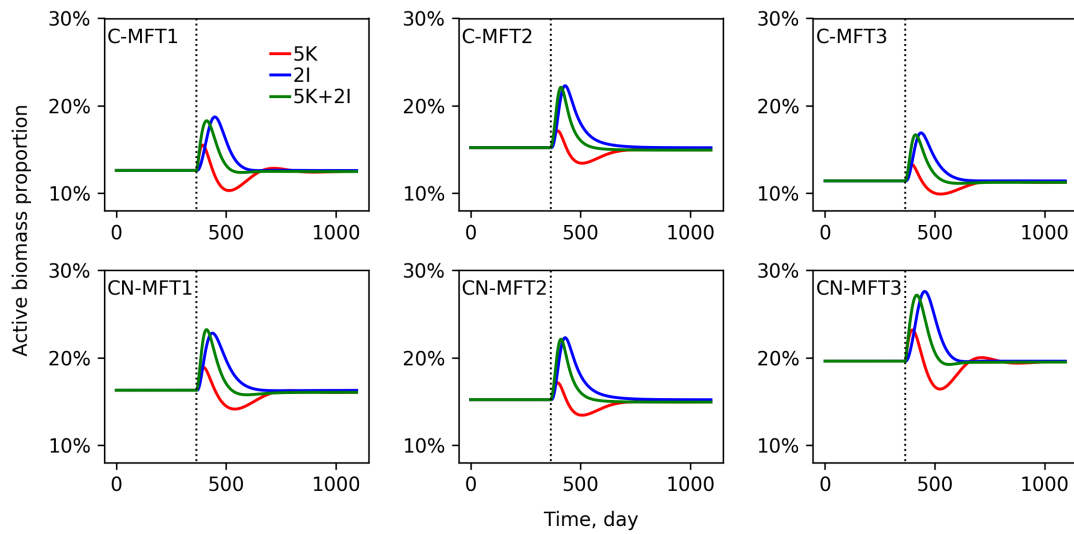

**Figure S2.** Change of active biomass proportion when temperature is stepwise increased by 5K at  $T=295.15$  K (5K), when FOM input doubles (2I) and both (5K+2I). The vertical black dotted line shows the time when the change of temperature and/or input was implemented

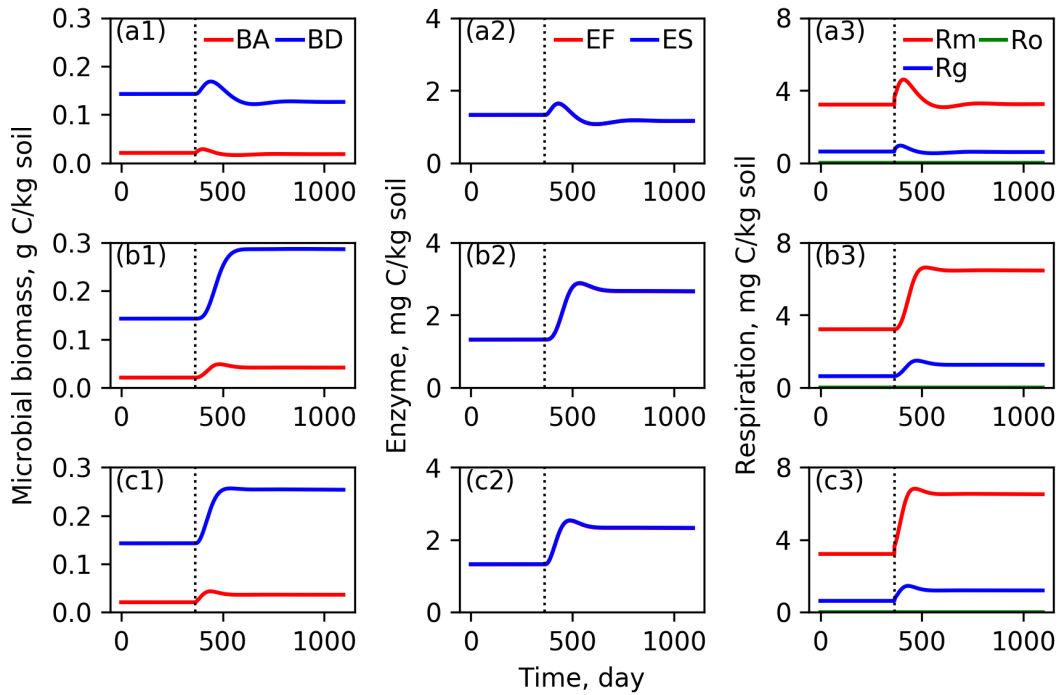

**Figure S3.** Evolutions of active (*BA*) and dormant (*BD*) microbial biomass, FOM-decomposing enzymes (*EF*) and SOM-decomposing enzymes (*ES*), maintenance respiration (*Rm*), growth respiration (*Rg*) and overflow respiration (*Ro*) for C-MFT1 (a ORCHIMIC variant with one generalist and no N dynamics) when temperature is stepwise increased by 5K (a1, a2 and, a3), when FOM input doubles (b1, b2 and b3), and both (c1, c2 and c3). The vertical black dotted line shows the time when 5K-stepwise increase of temperature and/or doubling input was implemented

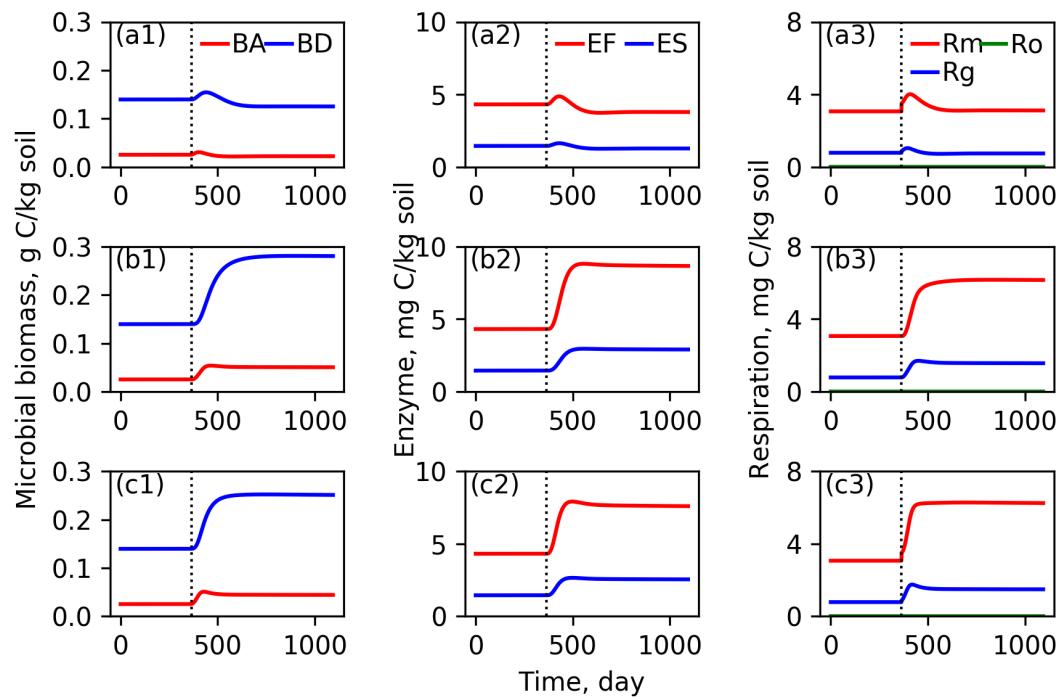

**Figure S4.** Evolutions of active (*BA*) and dormant (*BD*) microbial biomass, FOM-

decomposing enzymes (*EF*) and SOM-decomposing enzymes (*ES*), maintenance respiration (*Rm*), growth respiration (*Rg*) and overflow respiration (*Ro*) for C-MFT2 (a ORCHIMIC variant with two MFTs (one FOM specialist and one SOM specialist) and no N dynamics) when temperature is stepwise increased by 5K (a1, a2 and, a3), when FOM input doubles (b1, b2 and b3), and both (c1, c2 and c3). The vertical black dotted line shows the time when 5K-stepwise increase of temperature and/or doubling input was implemented

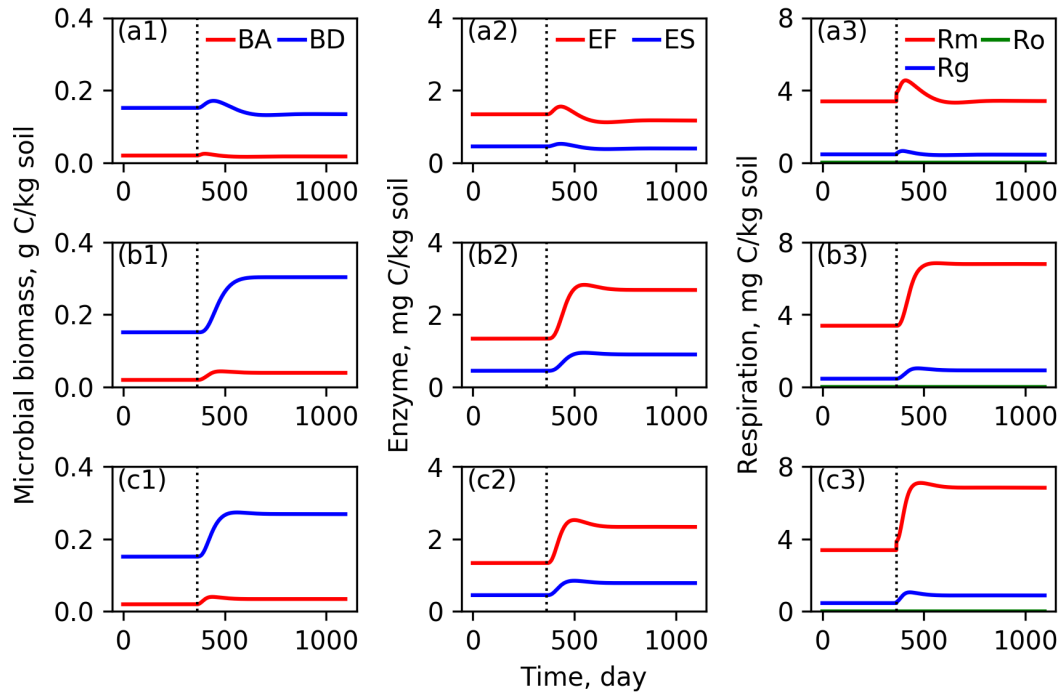

**Figure S5.** Evolutions of active (*BA*) and dormant (*BD*) microbial biomass, FOM-decomposing enzymes (*EF*) and SOM-decomposing enzymes (*ES*), maintenance respiration (*Rm*), growth respiration (*Rg*) and overflow respiration (*Ro*) for C-MFT3 (a ORCHIMIC variant with three MFTs (one generalist, one FOM specialist and one SOM specialist) and no N dynamics) when temperature is stepwise increased by 5K (a1, a2 and a3), when FOM input doubles (b1, b2 and b3), and both (c1, c2 and c3). The vertical black dotted line shows the time when 5K-stepwise increase of temperature and/or doubling input was implemented

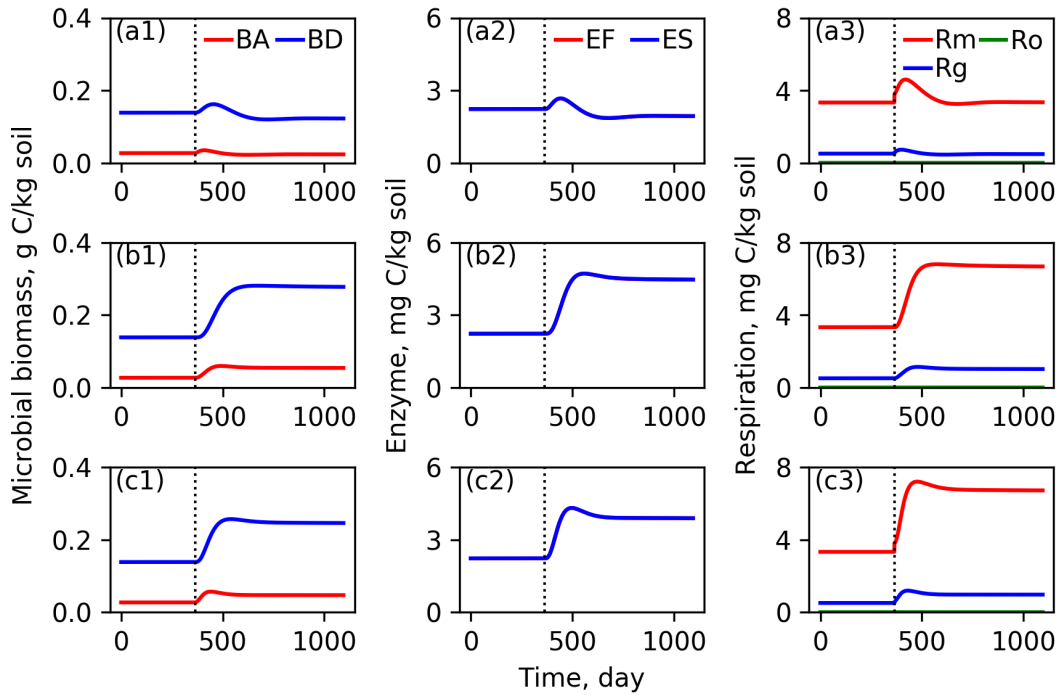

**Figure S6.** Evolutions of active (*BA*) and dormant (*BD*) microbial biomass, FOM-decomposing enzymes (*EF*) and SOM-decomposing enzymes (*ES*), maintenance respiration (*Rm*), growth respiration (*Rg*) and overflow respiration (*Ro*) for CN-MFT1 (a ORCHIMIC variant with one generalist and N dynamics) when temperature is stepwise increased by 5K (a1, a2 and, a3), when FOM input doubles (b1, b2 and b3), and both (c1, c2 and c3). The vertical black dotted line shows the time when 5K-stepwise increase of temperature and/or doubling input was implemented

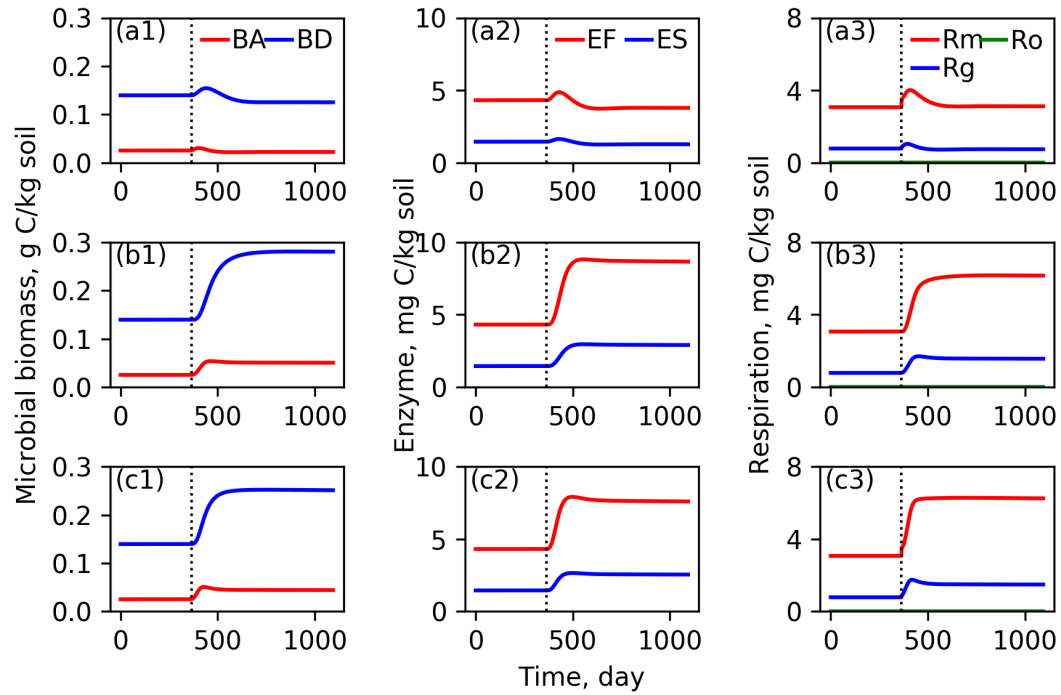

**Figure S7.** Evolutions of active (*BA*) and dormant (*BD*) microbial biomass, FOM-decomposing enzymes (*EF*) and SOM-decomposing enzymes (*ES*), maintenance respiration

( $R_m$ ), growth respiration ( $R_g$ ) and overflow respiration ( $R_o$ ) for C-MFT3 (a ORCHIMIC variant with two MFTs (one FOM specialist and one SOM specialist) and N dynamics) when temperature is stepwise increased by 5K (a1, a2 and, a3), when FOM input doubles (b1, b2 and b3), and both (c1, c2 and c3). The vertical black dotted line shows the time when 5K-stepwise increase of temperature and/or doubling input was implemented

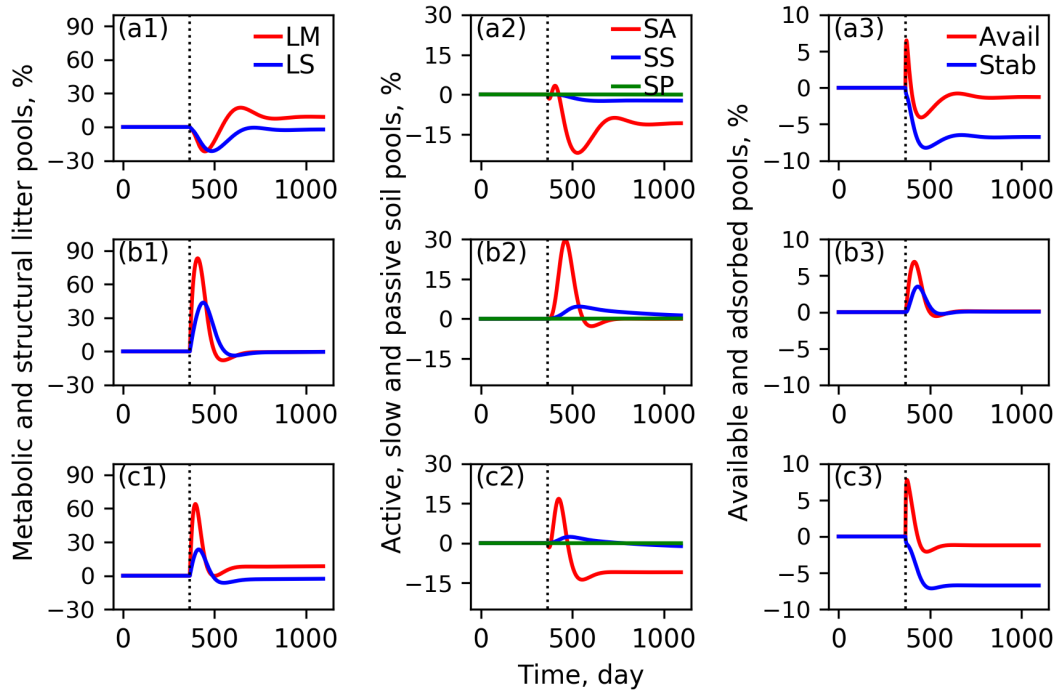

**Figure S8.** Relative change of C in metabolic ( $LM$ ) and structural ( $LS$ ) litter pools (a1, b1 and c1), active ( $SA$ ), slow ( $SS$ ) and passive ( $SP$ ) soil pools (a2, b2 and c2), available ( $Avail$ ) and adsorbed ( $Absorb$ ) pools (a3, b3 and c3) for C-MFT1 model when temperature is stepwise-increased by 5K at  $T = 295.15$  K (a1, a2 and a3), when FOM input doubles (b1, b2 and b3), and both (c1, c2 and c3). The vertical black dotted line shows the time when the change of temperature and/or input was implemented

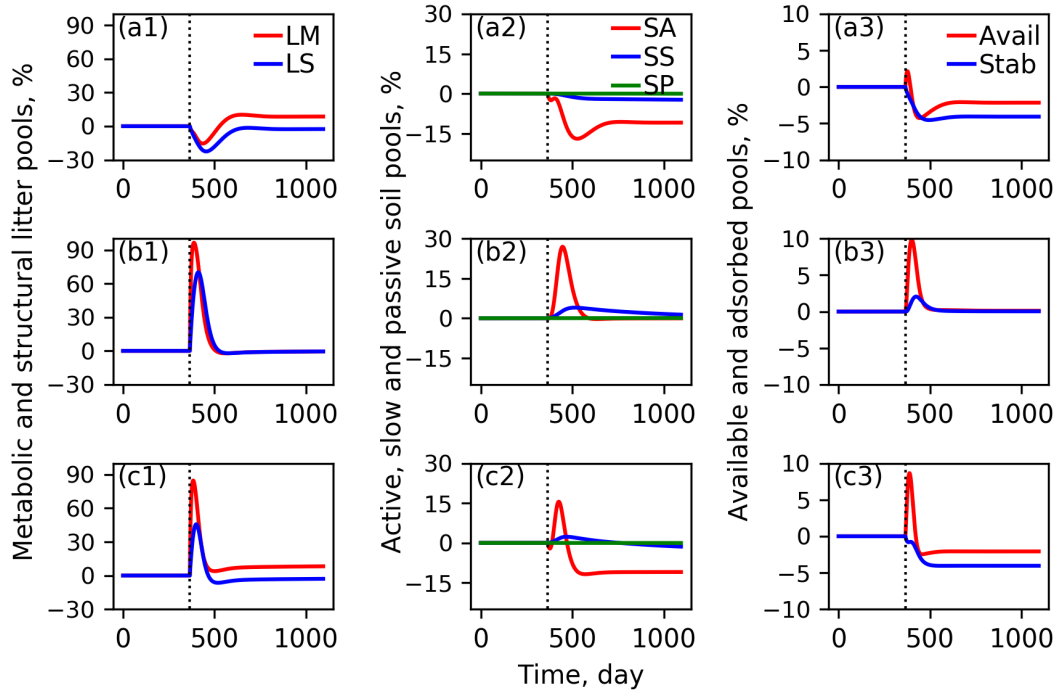

**Figure S9.** Relative change of C in metabolic (*LM*) and structural (*LS*) litter pools (a1, b1 and c1), active (*SA*), slow (*SS*) and passive (*SP*) soil pools (a2, b2 and c2), available (*Avail*) and adsorbed (*Absorb*) pools (a3, b3 and c3) for C-MFT2 model when temperature is stepwise-increased by 5K at  $T = 295.15$  K (a1, a2 and a3), when FOM input doubles (b1, b2 and b3), and both (c1, c2 and c3). The vertical black dotted line shows the time when the change of temperature and/or input was implemented

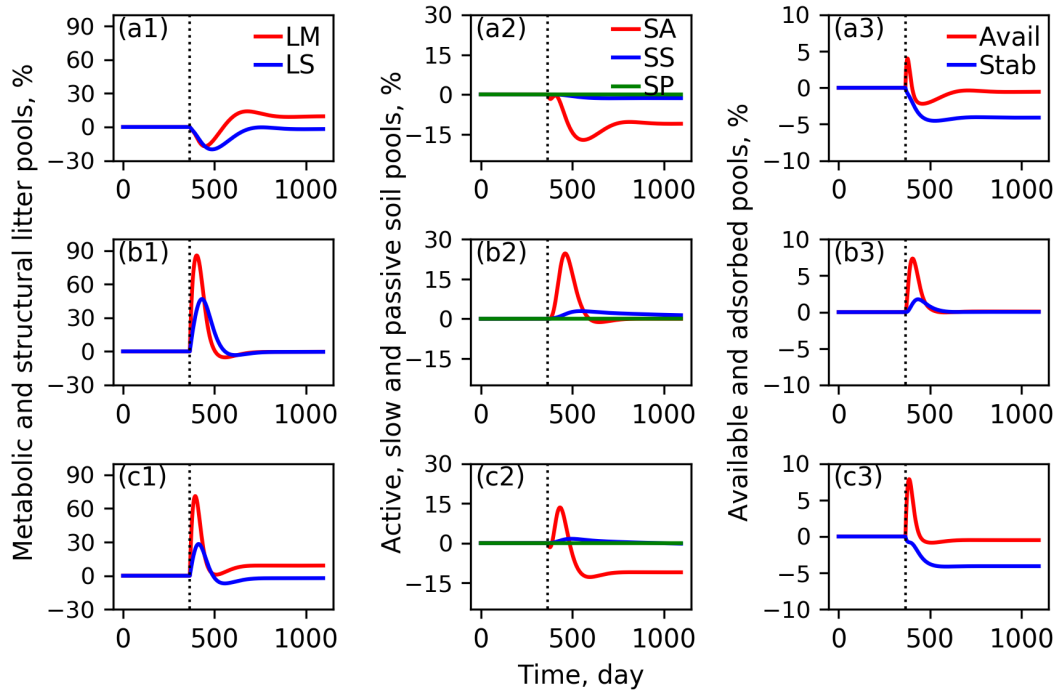

**Figure S10.** Relative change of C in metabolic (*LM*) and structural (*LS*) litter pools (a1, b1 and c1), active (*SA*), slow (*SS*) and passive (*SP*) soil pools (a2, b2 and c2), available (*Avail*) and adsorbed (*Absorb*) pools (a3, b3 and c3) for C-MFT3 model when temperature is



stepwise-increased by 5K at  $T = 295.15$  K (a, a2 and a3), when FOM input doubles (b1, b2 and b3), and both (c1, c2 and c3). The vertical black dotted line shows the time when the change of temperature and/or input was implemented

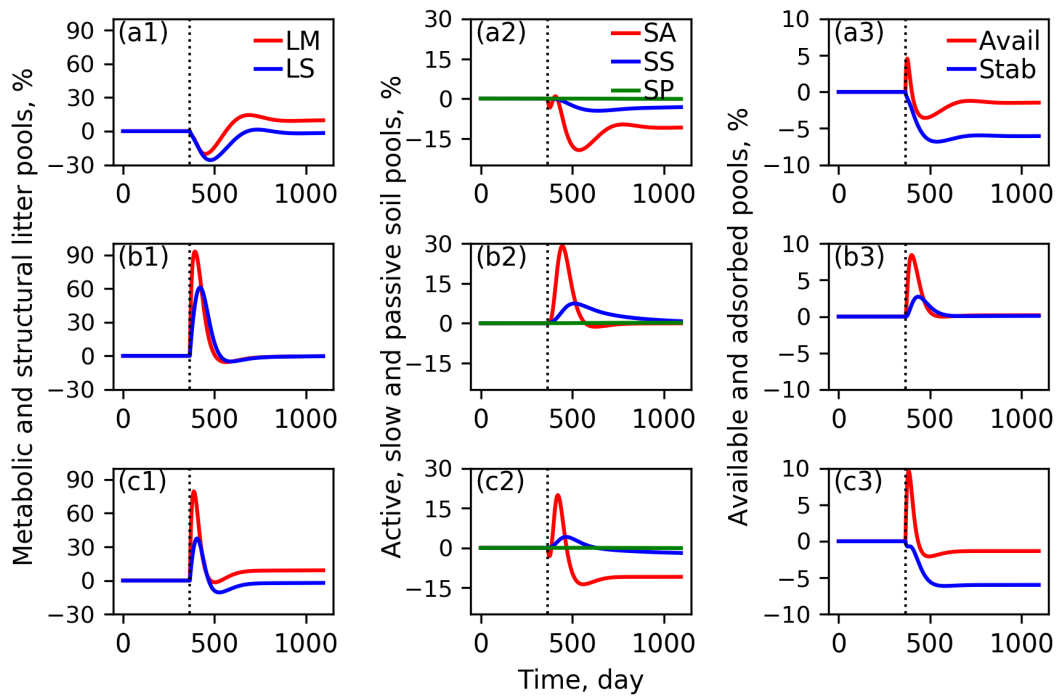

**Figure S11.** Relative change of C in metabolic (*LM*) and structural (*LS*) litter pools (a1, b1 and c1), active (*SA*), slow (*SS*) and passive (*SP*) soil pools (a2, b2 and c2), available (*Avail*) and adsorbed (*Absorb*) pools (a3, b3 and c3) for CN-MFT1 model when temperature is stepwise-increased by 5K at  $T = 295.15$  K (a1, a2 and a3), when FOM input doubles (b1, b2 and b3), and both (c1, c2 and c3). The vertical black dotted line shows the time when the change of temperature and/or input was implemented

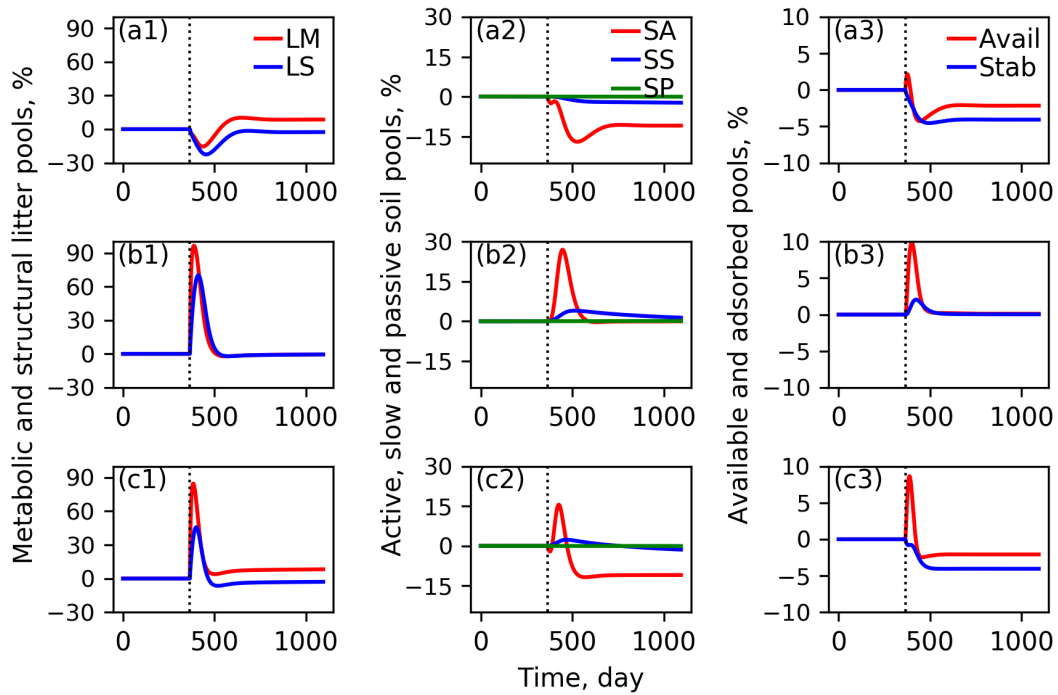

**Figure S12.** Relative change of C in metabolic (*LM*) and structural (*LS*) litter pools (a1, b1 and c1), active (*SA*), slow (*SS*) and passive (*SP*) soil pools (a2, b2 and c2), available (*Avail*) and absorbed (*Absorb*) pools (a3, b3 and c3) for CN-MFT2 model when temperature is stepwise-increased by 5K at  $T = 295.15$  K (a1, a2 and a3), when FOM input doubles (b1, b2 and b3), and both (c1, c2 and c3). The vertical black dotted line shows the time when the change of temperature and/or input was implemented

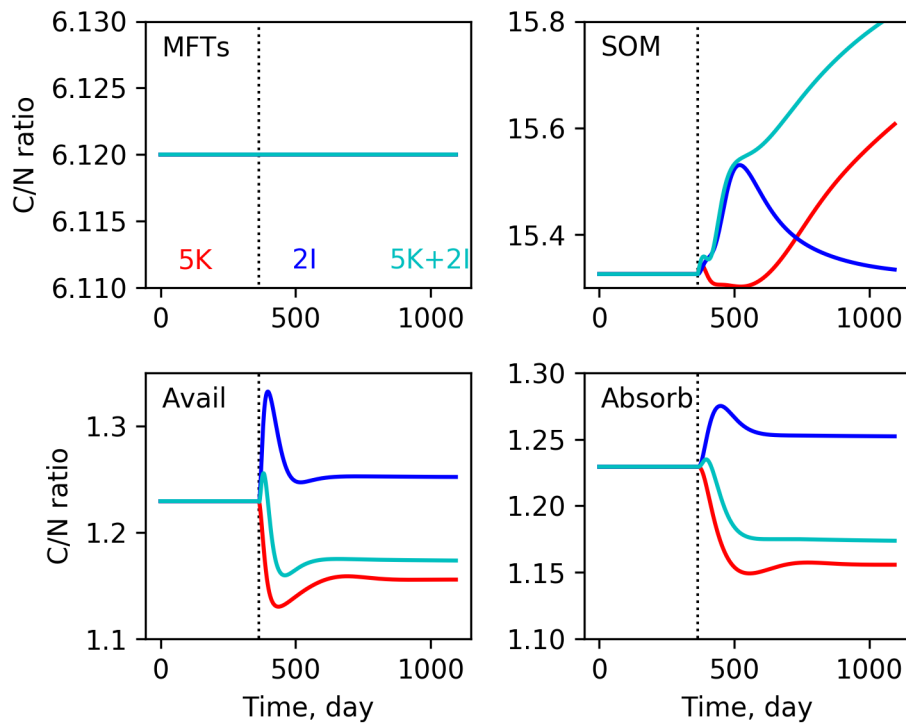

**Figure S13.** Change of C/N ratios for microbial (MFTs), soil organic matter (SOM), available

(*Avail*) and absorbed (*Absorb*) pools for CN-MFT1 model when temperature is stepwise-increased by 5K at T = 295.15 K (5K), when FOM input doubles (2I), and both (5K+2I). The vertical black dotted line shows the time when the change of temperature and/or input was implemented

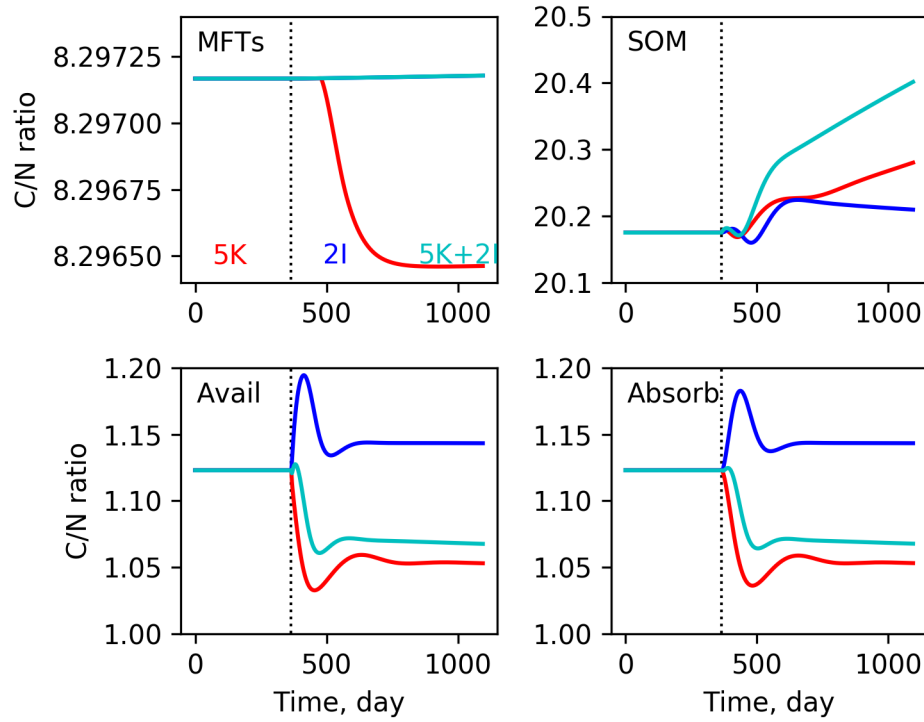

**Figure S14.** Change of C/N ratios for microbial (MFTs), soil organic matter (SOM), available (*Avail*) and absorbed (*Absorb*) pools for CN-MFT2 model when temperature is stepwise-increased by 5K at T = 295.15 K (5K), when FOM input doubles (2I), and both (5K+2I). The vertical black dotted line shows the time when the change of temperature and/or input was implemented

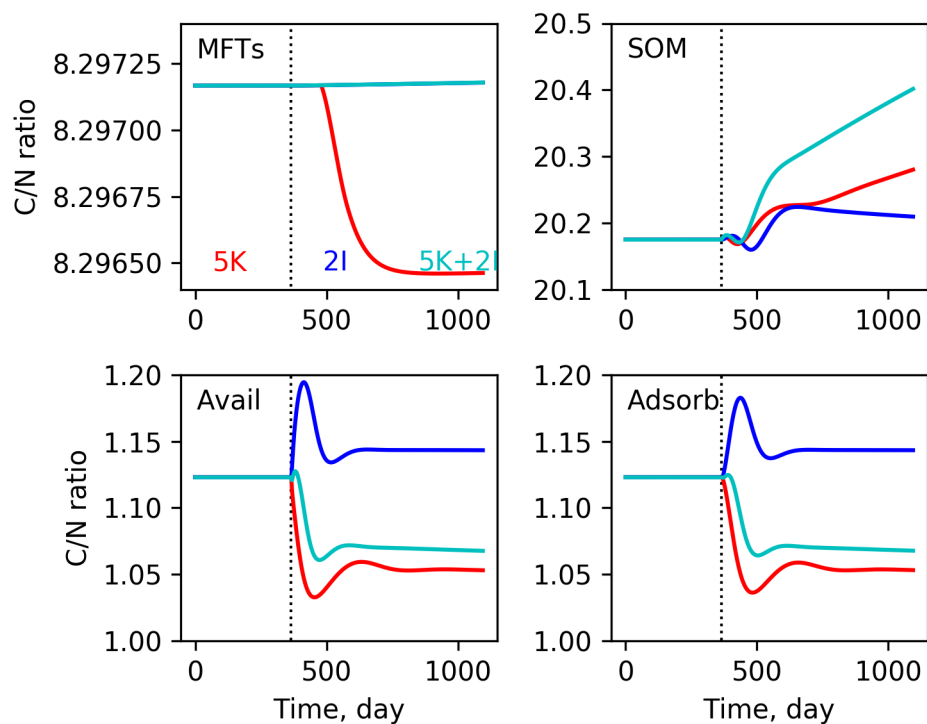

**Figure S15.** Change of C/N ratios for microbial (MFTs), soil organic matter (SOM), available (*Avail*) and absorbed (*Absorb*) pools for CN-MFT3 model when temperature is stepwise-increased by 5K at  $T = 295.15$  K (5K), when FOM input doubles (2I), and both (5K+2I). The vertical black dotted line shows the time when the change of temperature and/or input was implemented
